# Supplementary material for: Designer hydrogenated wrinkled yolk@shell TiO2 architectures towards advanced visible light photocatalysts for selective alcohol oxidation
Source: Royal Society of Chemistry journal article supplement (doi:10.1039/c8ta02012d), 2018-01-01
Supplement: c8ta02012d1.pdf [file c8ta02012d1.pdf]

## Supporting Information

### **Designer hydrogenated wrinkled Yolk@Shell TiO<sub>2</sub> architectures: towards advanced visible light photocatalysts for selective alcohol oxidations**

Abolfazl Ziarati,<sup>a</sup> Alireza Badiei,<sup>\*a</sup> Rafael Luque,<sup>\*b,c</sup> Weiyi Ouyang,<sup>b</sup>

<sup>a</sup>School of Chemistry, College of Science, University of Tehran, Tehran 1417614418, Iran

\*E-mail: [abadiei@khayam.ut.ac.ir](mailto:abadiei@khayam.ut.ac.ir)

<sup>b</sup>Departamento de Química Orgánica, Universidad de Córdoba, Campus de Rabanales, Ctra Nnal IV-A, Km 396 Edificio Marie Curie, Córdoba E-14014, Spain

\*E-mail: [rafael.luque@uco.es](mailto:rafael.luque@uco.es)

<sup>c</sup>Peoples Friendship University of Russia (RUDN University), 6 Miklukho-Maklaya str., 117198, Moscow, Russia

## Materials and apparatus:

All the chemical reagents used in our experiments were purchased from Sigma-Aldrich and Merck and were used as received without further purification.

UV–vis DRS of samples was obtained using AvaSpec-2048 TEC spectrometer. Microscopic morphology of products was visualized by SEM (Tescan, Mira3). The compositional analysis was done by energy dispersive analysis of X-ray (EDX, Kevex, Delta Class I). Powder X-ray diffraction (XRD) was carried out on a Philips diffractometer of X'pert Company with monochromatized Cu K $\alpha$  radiation ( $\lambda = 1.5406 \text{ \AA}$ ). Raman shift was recorded with a handheld Raman analyzer (Firstguard, Rigaku), that was excited by 1064 nm laser radiation. XPS measurements were performed using a VG Scientific photoelectron spectrometer ESCALAB-210 using Al K $\alpha$  radiation (1486.6 eV) from an X-ray source operating at 15 kV and 20 mA. Transmission electron microscopy (TEM) was obtained on Philips CM30 with an accelerating voltage of 150 kV. High resolution transmission electron microscopy (HRTEM) was obtained on JEOL JEM 2010 - TEM under 220 KV. Textural properties of the samples were determined by N<sub>2</sub> physisorption using a Micromeritics TriStar II Plus. high performance liquid chromatography (HPLC, Waters Model 590 pump) equipped with a Dual Absorbance Detector (Waters 2487) and the SunFire<sup>TM</sup> C18 (3.5  $\mu$ m, 150 mm length, 4.6 mm inner diameter) column provided by Waters. Gas chromatography (GC) analysis was performed using a Varian CP 3800 instrument with a flame-ionization detector (FID) using silicon DC-200 or carbowax 20 M columns. The conversion and selectivity of the oxidation reactions were defined as follows:

$$\text{Conversion (\%)} = [(C_0 - C_{BA})/C_0] \times 100$$

$$\text{Selectivity (\%)} = [C_{BAD}/(C_0 - C_{BA})] \times 100$$

where  $C_0$  is the initial concentration of benzyl alcohol,  $C_{BA}$  and  $C_{BAD}$  are the concentrations of the reaction substrate benzyl alcohol and corresponding benzaldehyde at a certain time after the photocatalytic reaction, respectively.

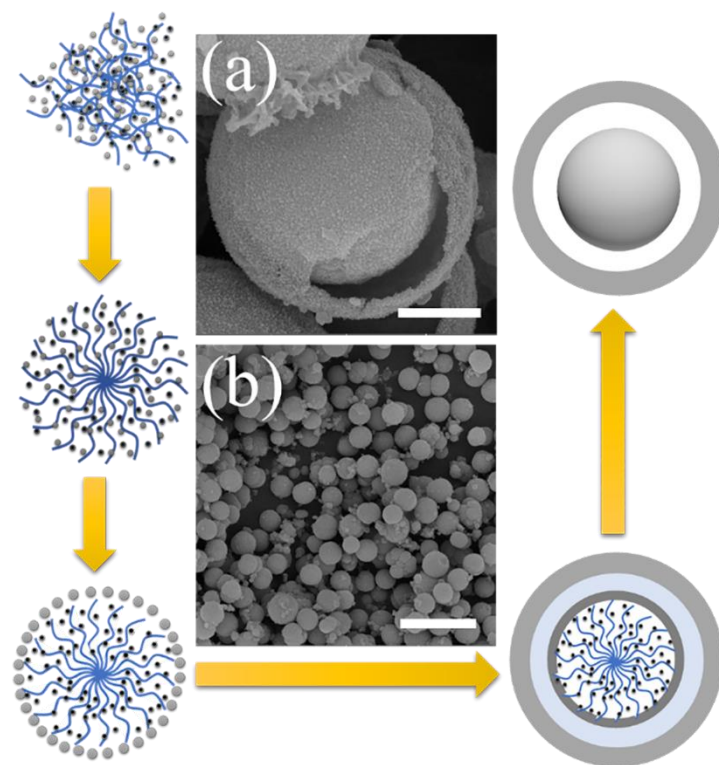

**Fig. S1.** Schematic diagram of the formation of Y@S-TiO<sub>2</sub> microspheres. The scale bar is 1  $\mu\text{m}$ . The scale bars are 1  $\mu\text{m}$  (a) and 10  $\mu\text{m}$  (b).

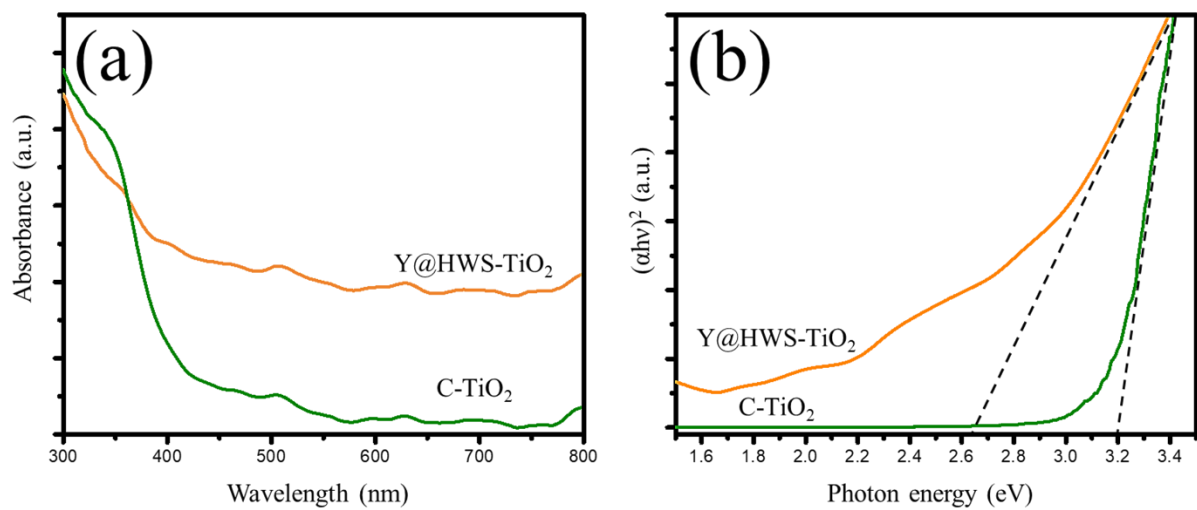

**Fig. S2.** UV-Vis spectra of C-TiO<sub>2</sub> and Y@HWS-TiO<sub>2</sub> (a); plot of  $(\alpha h\nu)^2$  vs.  $h\nu$  for C-TiO<sub>2</sub> and Y@HWS-TiO<sub>2</sub> (b)

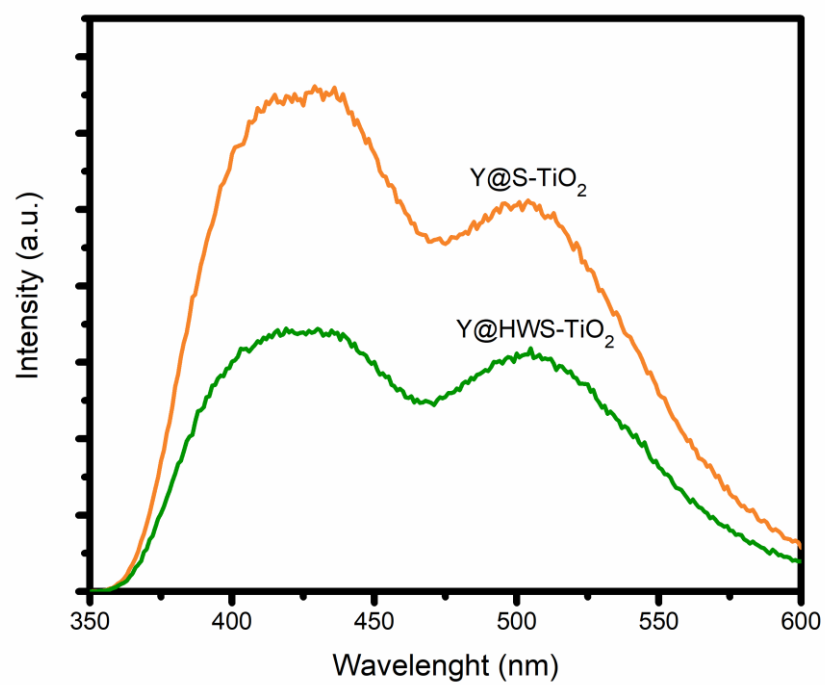

**Fig. S3.** Photoluminescence spectra of C-TiO<sub>2</sub> and Y@HWS-TiO<sub>2</sub>

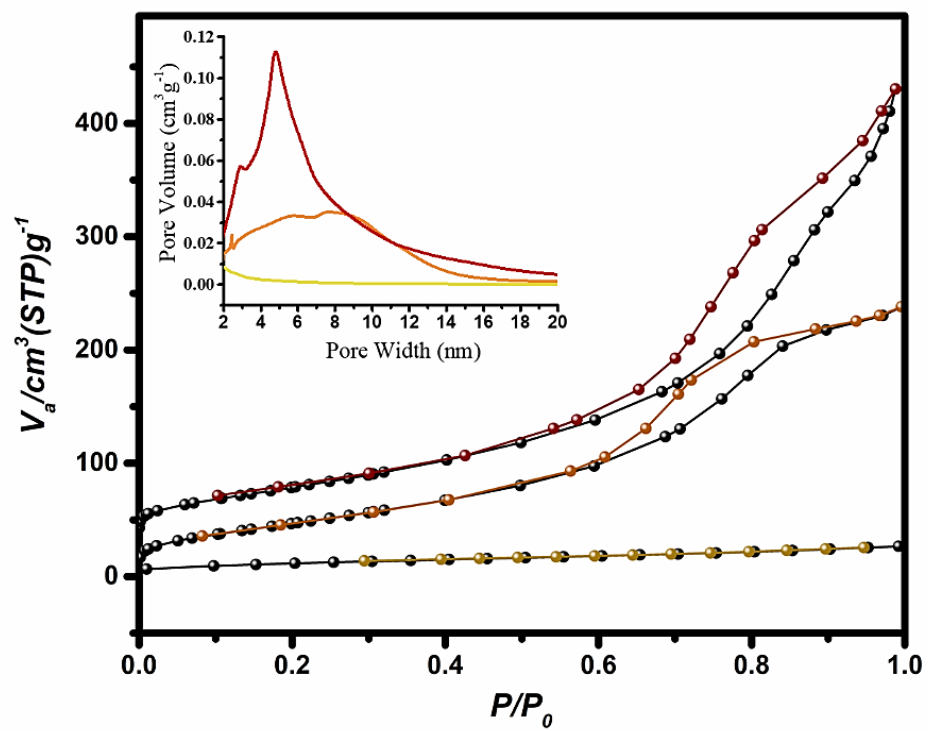

**Fig. S4.** Nitrogen adsorption-desorption isotherms of C-TiO<sub>2</sub>, Y@S-TiO<sub>2</sub> and Y@HWS-TiO<sub>2</sub>.

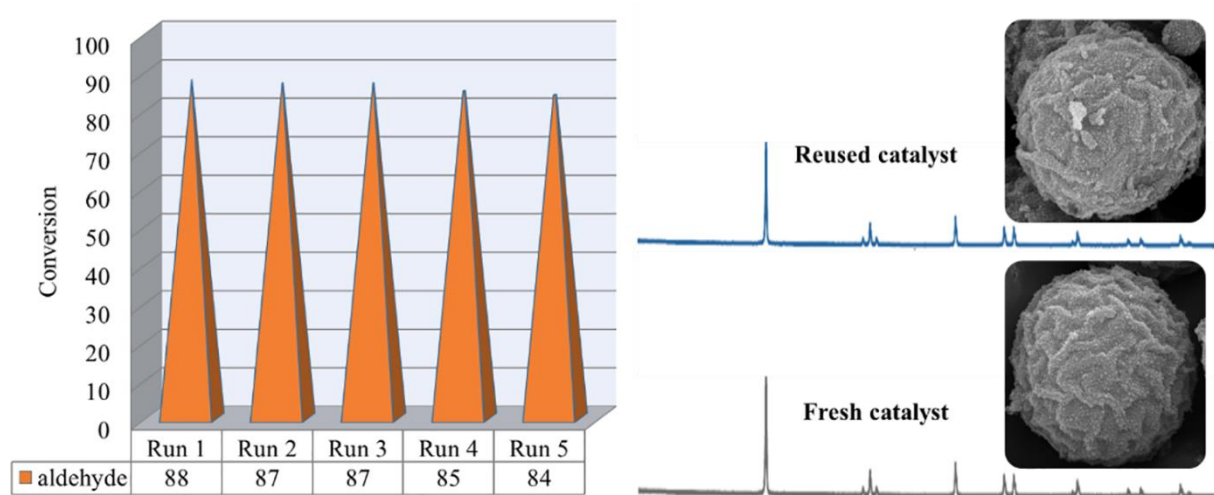

**Fig. S5.** Reusability study of Y@HWS-TiO<sub>2</sub> in the selective oxidation of benzyl alcohol.

**Table S1.** Comparing the efficiency of different reported photocatalysts in the selective oxidation of benzyl alcohol

| Entry | Catalyst                                  | Time (h) | Noble metal | Reusable (run) | Conversion (%) | Selectivity (%) | Ref       |
|-------|-------------------------------------------|----------|-------------|----------------|----------------|-----------------|-----------|
| 1     | UiO-66-NH <sub>2</sub> -F                 | 24       | ---         | ---            | 53.9           | 99              | [1]       |
| 2     | AgBr@Ag@TiO <sub>2</sub>                  | 8        | ✓           | 3              | 73             | 98              | [2]       |
| 3     | Bi <sub>2</sub> MoO <sub>6</sub> /Pt      | 6        | ✓           | ---            | 87             | 95              | [3]       |
| 4     | Ru/TiO <sub>2</sub> nanobelts             | 5        | ✓           | ---            | 72             | 81              | [4]       |
| 5     | Ni/NH <sub>2</sub> -MIL-125               | 10       | ---         | 3              | 21.5           | 99              | [5]       |
| 6     | hollow Ti <sup>3+</sup> /TiO <sub>2</sub> | 7        | ---         | ---            | 22.7           | 99              | [6]       |
| 7     | CdS@SnO <sub>2</sub> Nanorods             | 8        | ---         | ----           | 80             | 90              | [7]       |
| 8     | Meso-porous WO <sub>3</sub>               | 4        | ---         | ---            | 57             | 99              | [8]       |
| 9     | Y@HWS-TiO <sub>2</sub>                    | 3        | ---         | 5              | 88             | 97              | This work |

## References:

1. T. W. Goh, C. Xiao, R. V. Maligal-Ganesh, X. Li and W. Huang, *Chem. Eng. J.*, 2015, **124**, 45-51.
2. P. Zhang, P. Wu, S. Bao, Z. Wang, B. Tian and J. Zhang, *Chem. Eng. J.*, 2016, **306**, 1151-1161.
3. B. Zhang, J. Li, Y. Gao, R. Chong, Z. Wang, L. Guo, X. Zhang and C. Li, *J. Catal.*, 2017, **345**, 96-103.
4. J. Tian, J. Li, N. Wei, X. Xu, H. Cui and H. Liu, *Ceram. Int.*, 2016, **42**, 1611-1617.
5. Y. Fu, L. Sun, H. Yang, L. Xu, F. Zhang and W. Zhu, *Appl. Catal. B Environ.*, 2016, **187**, 212-217.
6. Y. Chen, W. Li, J. Wang, Y. Gan, L. Liu and M. Ju, *Appl. Catal. B Environ.*, 2016, **191**, 94-105.
7. Y. Liu, P. Zhang, B. Tian and J. Zhang, *ACS Appl. Mater. Interfaces*, 2015, **7**, 13849-13858.
8. Y. Su, Z. Han, L. Zhang, W. Wang, M. Duan, X. Li, Y. Zheng, Y. Wang and X. Lei, *Appl. Catal. B Environ.*, 2017, **217**, 108-114.
